# Supplementary material for: Differential Expression of mRNAs in the Brain Tissues of Patients with Alzheimer's Disease Based on GEO Expression Profile and Its Clinical Significance
Source: Biomed Res Int. 2019 Feb 26;2019:8179145. doi: 10.1155/2019/8179145 (PMC6413412; doi:10.1155/2019/8179145)
Supplement: Supplementary Materials — Supplemental Table 1 is the list of 68 differential mRNAs' expressions in both PBMCs' microarrays. Supplemental Table 2 is the list of 154 mRNAs in the two HIP microarrays. Supplemental Figures 1–4 correspond to Figures 2(a)–2(d). Supplemental Figures 5–8 correspond to Figures 3(a)–3(d). [file 8179145.f1.zip]

Archive with 10 entries (10 files):
- 1.pdf
- 2.pdf
- 3.pdf
- 4.pdf
- 5.png
- 6.png
- 7.png
- 8.png
- Supplemental Table 1.txt
- Supplemental Table 2.txt
