# Supplementary material for: Differential Expression of mRNAs in the Brain Tissues of Patients with Alzheimer's Disease Based on GEO Expression Profile and Its Clinical Significance
Source: Biomed Res Int. 2019 Feb 26;2019:8179145. doi: 10.1155/2019/8179145 (PMC6413412; doi:10.1155/2019/8179145)
Supplement: Supplementary Materials — Supplemental Table 1 is the list of 68 differential mRNAs' expressions in both PBMCs' microarrays. Supplemental Table 2 is the list of 154 mRNAs in the two HIP microarrays. Supplemental Figures 1–4 correspond to Figures 2(a)–2(d). Supplemental Figures 5–8 correspond to Figures 3(a)–3(d). [file 8179145.f1.zip › Supplemental Table 1.txt]

NRP2
RPLP2
TSPAN8
DLK1
MMP28
ZNF346
CALB1
CITED1
YBX1
HBA2///HBA1
KLHL29
MCM8
CDKN2A
HEY1
MAPT
LTF
MSN
CASP2
GTPBP1
STMN3
KHDC1L
CHODL
SPINT1
ZNF3
FMN2
NABP2
CD36
CLIC3
DOK5
AAMDC
DOK6
C15orf52
CFL1
PIAS2
RAB7A
TWSG1
CXCL5
CEP95
ZSCAN5A
ARHGAP35
CHEK1
CLDN11
ITGB1
SFT2D1
P3H4
AKT1S1
HLA-DRB4
GATAD2A
MSI2
SLC39A3
HBB
DCAKD
PLP1
SPSB1
CHI3L1
MACROD1
PRPSAP1
ACPP
ZBED2
PLEKHA6
RGS1
RAPSN
CDH19
PPIC
IGFBP2
IGLC1
IGFBP5
TXNL4A
