# Supplementary material for: Differential Expression of mRNAs in the Brain Tissues of Patients with Alzheimer's Disease Based on GEO Expression Profile and Its Clinical Significance
Source: Biomed Res Int. 2019 Feb 26;2019:8179145. doi: 10.1155/2019/8179145 (PMC6413412; doi:10.1155/2019/8179145)
Supplement: Supplementary Materials — Supplemental Table 1 is the list of 68 differential mRNAs' expressions in both PBMCs' microarrays. Supplemental Table 2 is the list of 154 mRNAs in the two HIP microarrays. Supplemental Figures 1–4 correspond to Figures 2(a)–2(d). Supplemental Figures 5–8 correspond to Figures 3(a)–3(d). [file 8179145.f1.zip › Supplemental Table 2.txt]

RAD51B
IL9R
MASP1
CYP2D6
GCAT
MPV17
CSPG5
FOXO4
PRKG1
CNOT4
ST3GAL1
GOT1
ANK1
DDX11
INCENP
EIF1AY
ST3GAL6
SPRED2
RAB27B
ITFG1
KLRB1
EDDM3A
SEMG1
IQCK
STMN2
RBL1
BICD2
NKTR
ERMAP
OGFOD3
CD38
TRIM36
F5
RFK
HHLA2
COL1A1
EFNA4
NEU3
EDA
MFAP5
SMARCA4
GC
C14orf1
RAB7A
IFIH1
FAM149B1
SSH3
XIST
MRPS12
RABGAP1L
SP110
ITGB3
CD72
ITGB1
FBXW4P1
LOC100996756
CNR1
DDX3Y
CYP3A7-CYP3A51P///CYP3A7
B4GALT6
RUNX3
SFTPB
GPD2
MUC1
CREBBP
MET
ZMYM5
GRIN1
ATP11A
YTHDC1
ATR
BRCA1
GNGT1
PHF3
HOXB1
ZRSR1///SRP19
PARPBP
SLC13A1
LOC389906
CD79B
TLL2
PDCD6
ANKRD36BP2
JPH3
ATP6V0E1
TIMM17A
ELF5
ARSJ
RASSF8
PAX3
SPAG11A///SPAG11B
GTSE1
EDNRA
XYLT2
PAX8
LOC101060835///HLA-DQB1
LOC105373738
G3BP2
NRXN1
MCTP1
MYCN
ZDHHC17
BGN
FRMD4B
SGCD
RPS4Y1
NCAPH2
MAPRE3
PTAFR
PMS2P9///PMS2P6///LOC441259///PMS2P5///PMS2P4///PMS2P1
RIN3
RAB3B
CCK
EXOC7
USP9Y
CABP1
COL3A1
EHF
COMT
TMEM259
MTHFR
FCN2
KIR3DX1
SYN2
NPAT
ETV2
SLC4A7
RFPL1
SNAP25
ERF
GLRB
CR1
ZBTB7C
KLK2
LRRN2
ELAVL2
CYP4F12
SF3A2
WWTR1
KANK3
RCAN3
MIR6883///PER1
SLC16A5
NPHS2
DR1
FAHD2CP///FAHD2B///FAHD2A
PGK1
DUS4L
NR5A2
TBL1X
HPGD
YKT6
SELE
TOB2
