# Supplementary figures and images for: Differential Expression of mRNAs in the Brain Tissues of Patients with Alzheimer’s Disease Based on GEO Expression Profile and Its Clinical Significance
Source: Hindawi journal article supplement (doi:10.1155/2019/8179145), 2019-02-26

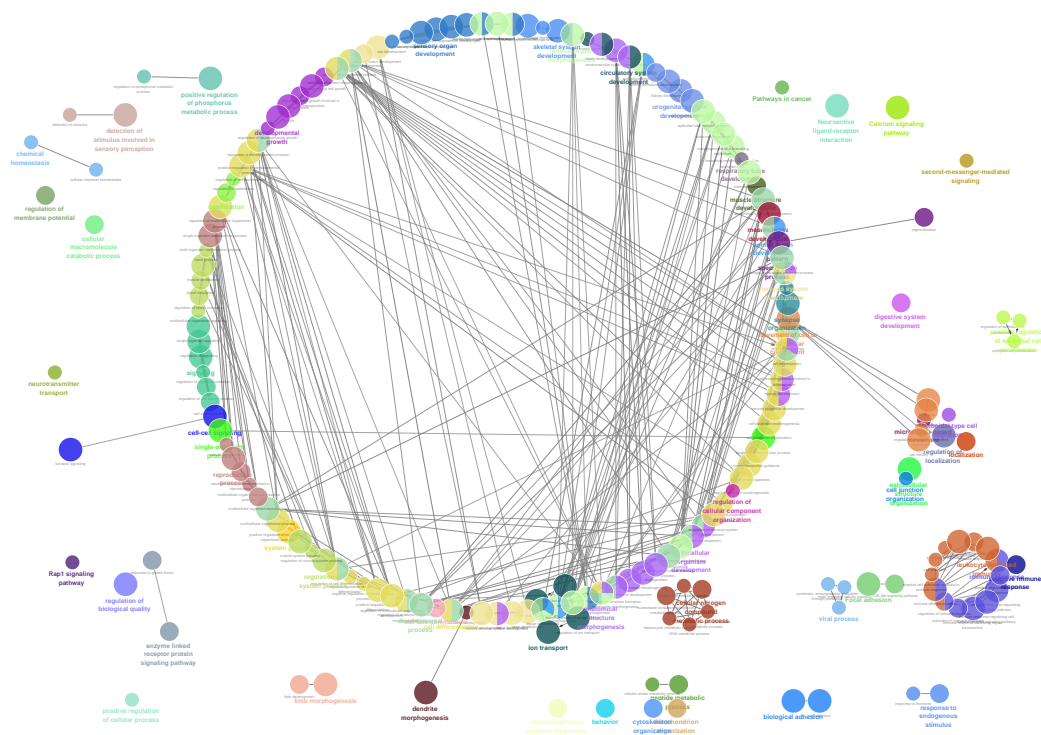

Supplement: f1 [file 8179145.f1.zip]

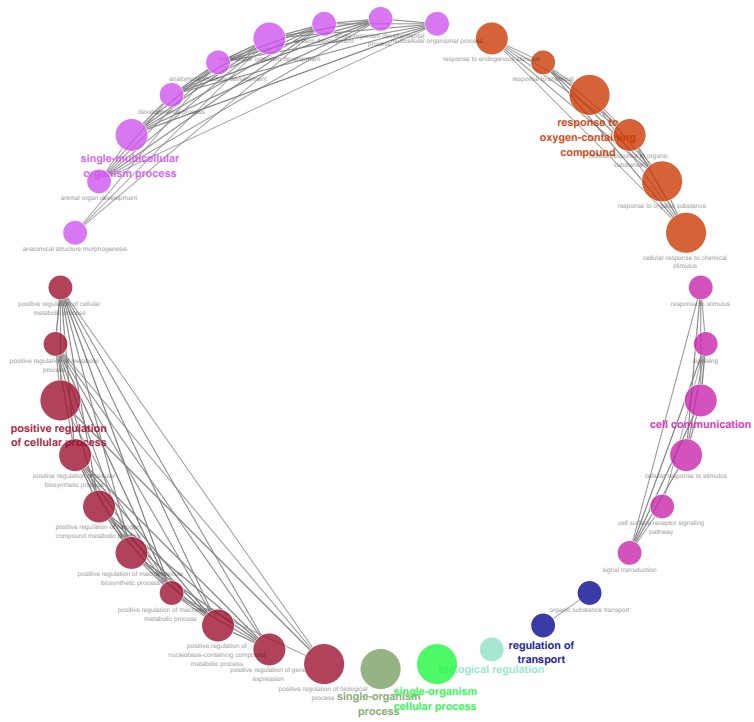

Supplement: f1 [file 8179145.f1.zip]

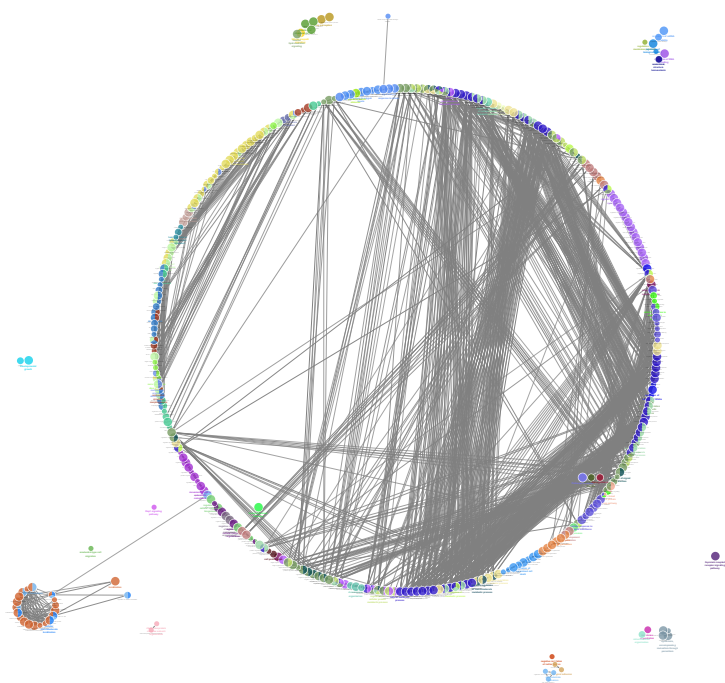

Supplement: f1 [file 8179145.f1.zip]

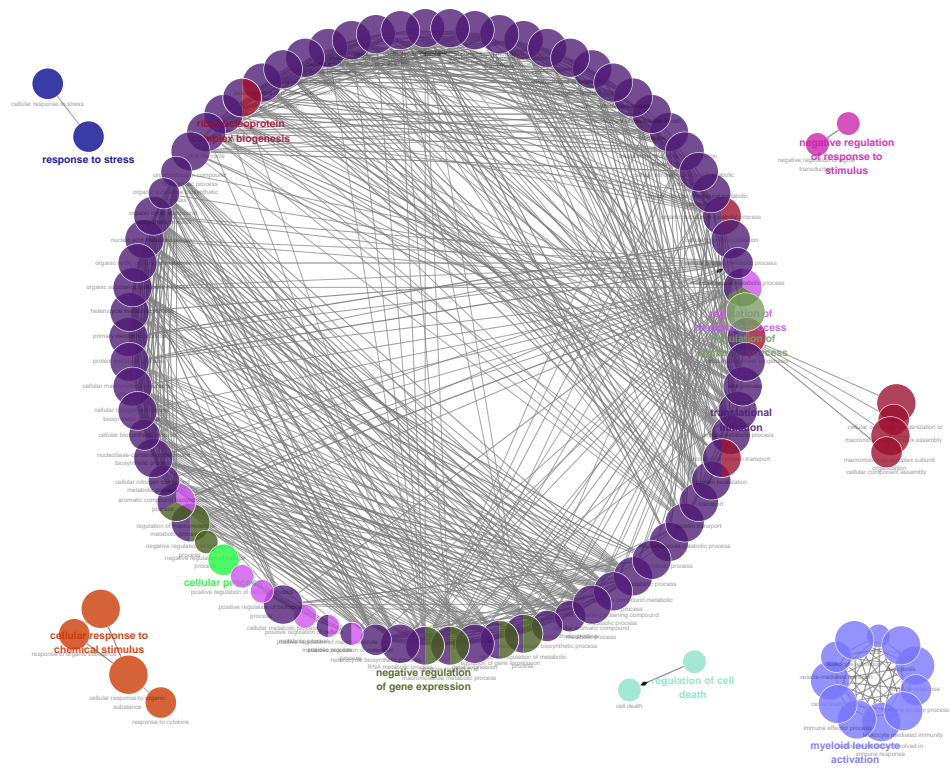

Supplement: f1 [file 8179145.f1.zip]
